# Supplementary material for: KCNQ1 p.L353L affects splicing and modifies the phenotype in a founder population with long QT syndrome type 1
Source: PubMed Central journal article supplement — J Med Genet. 2017 Mar 6;54(6):390–8. doi: 10.1136/jmedgenet-2016-104153 (PMC5502312; doi:10.1136/jmedgenet-2016-104153), 2017-03-06
Supplement: jmedgenet-2016-104153supp001.pdf [file jmedgenet-2016-104153supp001.pdf]

### Supplemental Figure for Male and Female Combined Results

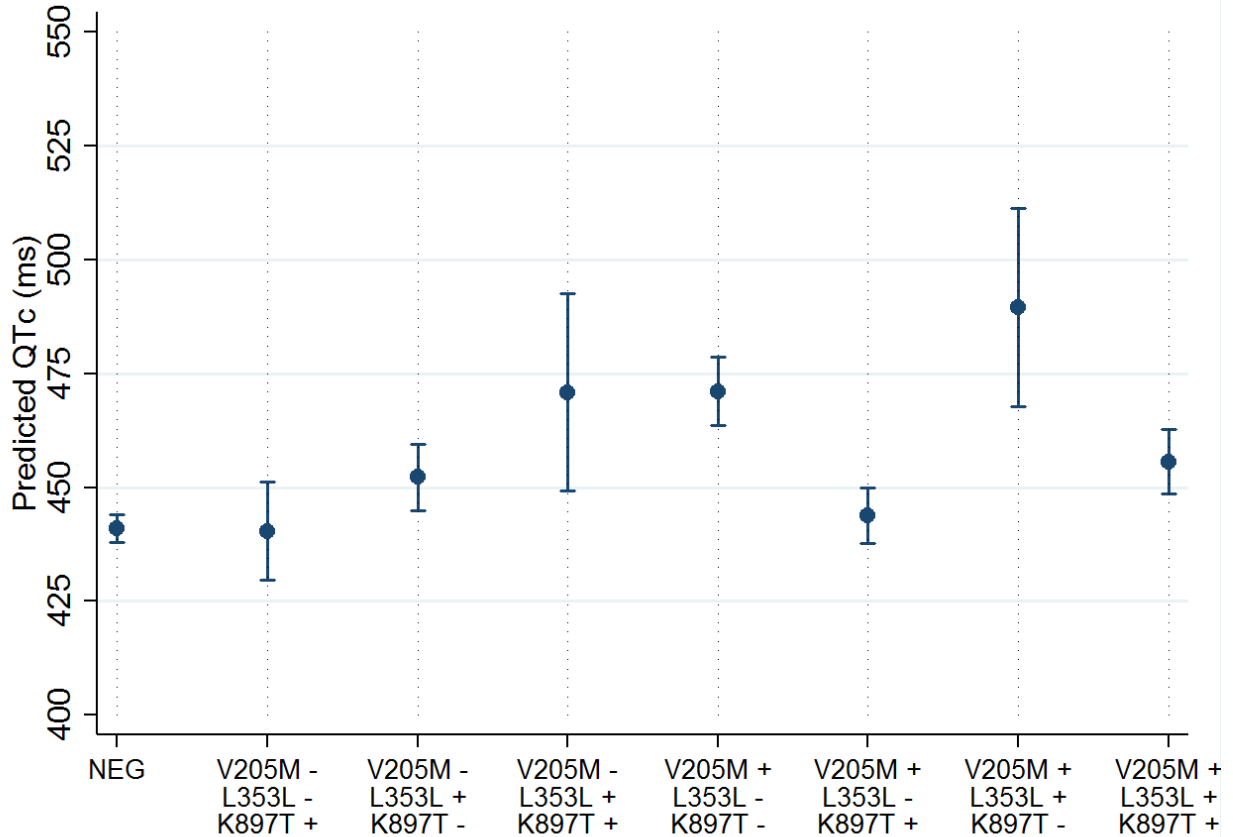

**Figure 1 (supplemental): Adjusted Predicted QTc in Interaction Regression Model Males and Females Combined.** Predicted effects of expected QTc in females with p.V205M, p.L353L and p.K879T above 422.3 ms. Both models were adjusted conditionally for age, cardiovascular diseases, past and current alcohol abuse, QT prolonging drugs, and indicator variable for interpolated QTc. The predicted QTc is shown on the Y axis in milliseconds and variant status on the X axis.
